# Supplementary material for: Genomic characterization of Gli-activator targets in sonic hedgehog-mediated neural patterning
Source: Oxford University Press journal article supplement (doi:10.1242/dev.001966), 2007-04-18
Supplement: dev001966tables_1-9.pdf [file dev001966tables_1-9.pdf]

**Table S1. Genomic loci present on the 44K genomic tiling array**

| Gene               | ID           | Chromosome | Strand | TSS       | TES       | Coverage | Category |
|--------------------|--------------|------------|--------|-----------|-----------|----------|----------|
| Gli                | NM_010296    | 10         | -      | 127066524 | 127078216 | 150001   | Positive |
| Ptch1              | NM_008957    | 13         | -      | 60894523  | 60948510  | 150001   | Positive |
| Ptch2              | NM_008958    | 4          | +      | 116055261 | 116073736 | 148978   | Positive |
| Hhip               | NM_020259    | 8          | -      | 79185727  | 79272113  | 150001   | Positive |
| Foxa2              | NM_010446    | 2          | -      | 147499859 | 147503905 | 150001   | Positive |
| Nkx6-1             | NM_144955    | 5          | -      | 100679979 | 100685482 | 149959   | Positive |
| Nkx2-2             | NM_010919    | 2          | -      | 146640088 | 146643295 | 150001   | Positive |
| Hox D cluster      |              | 2          | n/a    | 74133959  | 74195987  | 62029    | Positive |
| Nkx2-1_Nkx2-9_Pax9 |              | 12         | n/a    | 53197523  | 53497991  | 300469   | Positive |
| Neurog2            | NM_009718    | 3          | +      | 126516140 | 126518624 | 50001    | Positive |
| Ascl1              | NM_008553    | 10         | -      | 87463687  | 87466041  | 50001    | Positive |
| Nkx6-2             | NM_183248    | 7          | -      | 133975237 | 133978657 | 49826    | Positive |
| Ntn1               | NM_008744    | 11         | -      | 67938664  | 68111778  | 50001    | Positive |
| Hsd11b2            | NM_008289    | 8          | +      | 104814482 | 104819145 | 50001    | Positive |
| Ccnd1              | NM_007631    | 7          | -      | 139343751 | 139352397 | 50001    | Positive |
| Cthrc1             | AK003674     | 15         | +      | 38976515  | 38986748  | 50001    | Positive |
| 3110038L01Rik      | NM_026524    | X          | +      | 8956434   | 8958633   | 50001    | Positive |
| Rab34              | NM_033475    | 11         | +      | 77914493  | 77917846  | 50001    | Positive |
| Foxd1              | NM_008242    | 13         | +      | 94542754  | 94545191  | 50001    | Positive |
| Foxf2              | NM_010225    | 13         | +      | 31105401  | 31111024  | 50001    | Positive |
| Foxc2              | NM_013519    | 8          | +      | 120472104 | 120474411 | 50001    | Positive |
| -                  | NM_177863    | 4          | -      | 81884119  | 82007294  | 50001    | Positive |
| AI504062           | AI504062     | 5          | +      | 3536607   | 3537009   | 56001    | Positive |
| Sall1              | NM_021390    | 8          | -      | 88313728  | 88327923  | 50001    | Positive |
| Shh                | NM_009170    | 5          | -      | 26906865  | 26917112  | 50001    | Positive |
| Foxf1a             | NM_010426    | 8          | +      | 120439995 | 120442399 | 50001    | Positive |
| Cspg2              | AK034871     | 13         | -      | 85826083  | 85857173  | 50001    | Positive |
| Leprel1            | NM_173379    | 16         | -      | 24747134  | 24892594  | 50001    | Positive |
| 9430010M06Rik      | AK020409     | 9          | -      | 24616095  | 24617172  | 50001    | Positive |
| Rhoe               | NM_028810    | 2          | -      | 51062603  | 51081273  | 50001    | Positive |
| 2310037P21Rik      | NM_001002267 | 9          | -      | 123277459 | 123278318 | 50001    | Positive |
| Colec11            | BC000078     | 12         | -      | 25160227  | 25182803  | 50001    | Positive |
| 3110070M22Rik      | NM_026084    | Un_random  | +      | 19413072  | 19414122  | 50001    | Positive |
| Tpd52l1            | NM_009413    | 10         | -      | 31372578  | 31486119  | 50001    | Positive |
| Ncor2              | NM_011424    | 5          | -      | 124178459 | 124340350 | 50001    | Positive |
| Galt               | NM_016658    | 4          | +      | 41894196  | 41897373  | 50001    | Positive |
| 3230401I01Rik      | NM_026140    | 7          | -      | 115916679 | 115944921 | 50001    | Positive |
| Homer2             | NM_011983    | 7          | -      | 75417865  | 75514933  | 50001    | Positive |
| Ccl27              | NM_011336    | 4          | -      | 41908172  | 41908905  | 50001    | Positive |
| Nkx2-5             | NM_008700    | 17         | -      | 24633727  | 24636672  | 50001    | Positive |
| Nkx3-1             | NM_010921    | 14         | +      | 63724262  | 63728228  | 50001    | Positive |
| Gdf1               | NM_008107    | 8          | +      | 69476431  | 69485066  | 50001    | Positive |
| -                  | BB344065     | X          | +      | 118149099 | 118149801 | 0        | Positive |
| Gpsm1              | NM_153410    | 2          | +      | 26247702  | 26280397  | 50001    | Positive |
| Ccnd2              | NM_009829    | 6          | -      | 127802646 | 127824339 | 50001    | Positive |
| Cdk2ap1            | NM_013812    | 5          | -      | 123516784 | 123525971 | 47196    | Positive |
| Cdk6               | NM_009873    | 5          | +      | 3350317   | 3528230   | 50001    | Positive |
| Arl4               | NM_007487    | 12         | -      | 36632029  | 36636075  | 50001    | Positive |
| Fbn2               | NM_010181    | 18         | -      | 58225408  | 58424955  | 50001    | Positive |
| Slit3              | AF144629     | 11         | +      | 34915546  | 35502170  | 50001    | Positive |
| Foxc1              | NM_008592    | 13         | +      | 31286268  | 31290256  | 50001    | Positive |
| Nsg2               | NM_008741    | 11         | +      | 31895253  | 31953996  | 50001    | Positive |
| Hoxa11             | NM_010450    | 6          | -      | 52386167  | 52389779  | 50001    | Positive |
| Hoxd11             | NM_008273    | 2          | +      | 74380142  | 74381886  | 50001    | Positive |
| Hoxd13             | NM_008275    | 2          | +      | 74366059  | 74367884  | 50001    | Positive |
| Hoxa13             | NM_008264    | 6          | -      | 52403288  | 52404984  | 50001    | Positive |

|               |              |           |   |           |           |       |          |
|---------------|--------------|-----------|---|-----------|-----------|-------|----------|
| Foxa1         | NM_008259    | 12        | - | 54272108  | 54277598  | 50001 | Positive |
| Myf5          | NM_008656    | 10        | - | 107369978 | 107373204 | 50001 | Positive |
| Vtn           | NM_011707    | 11        | + | 78224945  | 78227982  | 50001 | Positive |
| Pitx1         | NM_011097    | 13        | - | 54441613  | 54447983  | 50001 | Positive |
| Hlx           | NM_008250    | 1         | - | 184225321 | 184230785 | 50001 | Positive |
| Hand2         | NM_010402    | 8         | + | 56361191  | 56363149  | 50001 | Positive |
| Cdh5          | NM_009868    | 8         | + | 103396382 | 103438830 | 50001 | Positive |
| Csnk2a1       | NM_007788    | 2         | + | 151683883 | 151738781 | 50001 | Positive |
| Jag1          | NM_013822    | 2         | - | 136595317 | 136630150 | 50001 | Positive |
| Hey1          | NM_010423    | 3         | - | 8650291   | 8653917   | 50001 | Positive |
| Meox2         | NM_008584    | 12        | + | 33709011  | 33783546  | 50001 | Positive |
| Pou3f1        | NM_011141    | 4         | + | 123684765 | 123686282 | 50001 | Positive |
| Angptl6       | NM_145154    | 9         | - | 20751107  | 20756927  | 49924 | Positive |
| Ror1          | NM_013845    | 4         | + | 99054696  | 99401450  | 50001 | Negative |
| -             | BM211445     | 6         | - | 49390692  | 49391335  | 50001 | Negative |
| -             | BB759978     | 1         | - | 78388625  | 78389095  | 50001 | Negative |
| Igfbp2        | NM_008342    | 1         | + | 73126184  | 73154145  | 50001 | Negative |
| Irx3          | NM_008393    | 8         | - | 91085099  | 91087946  | 50001 | Negative |
| Msx1          | NM_010835    | 5         | - | 36327005  | 36330969  | 49989 | Negative |
| Msx2          | NM_013601    | 13        | - | 52026240  | 52031427  | 50001 | Negative |
| Snai2         | NM_011415    | 16        | + | 13416441  | 13419962  | 50001 | Negative |
| Crabp1        | NM_013496    | 9         | + | 54882658  | 54891162  | 50001 | Negative |
| Crabp2        | NM_007759    | 3         | + | 87692354  | 87697104  | 50001 | Negative |
| Fap           | NM_007986    | 2         | - | 62356345  | 62429421  | 50001 | Negative |
| Irx2          | NM_010574    | 13        | + | 68682462  | 68687568  | 50001 | Negative |
| Ptn           | NM_008973    | 6         | - | 36850202  | 36945899  | 50001 | Negative |
| Irx5          | NM_018826    | 8         | + | 91644914  | 91648572  | 50001 | Negative |
| 5031439A09Rik | NM_026582    | 3         | + | 158855550 | 158939401 | 50001 | Negative |
| Flrt3         | NM_178382    | 2         | - | 140172058 | 140185326 | 50001 | Negative |
| 6330404E20Rik | NM_028707    | 18        | + | 36188770  | 36238339  | 50001 | Negative |
| 6720477E09Rik | NM_178660    | 9         | - | 116564518 | 117239065 | 50001 | Negative |
| Paip1         | NM_145457    | 13_random | + | 16918866  | 16946076  | 50001 | Negative |
| Gsn           | NM_146120    | 2         | + | 35214602  | 35240054  | 49986 | Negative |
| MGC57096      | NM_183191    | 3         | - | 63364164  | 63519393  | 50001 | Negative |
| -             | BE685845     | 7         | + | 122858915 | 122859376 | 50001 | Negative |
| Fabp7         | NM_021272    | 10        | + | 58050984  | 58054546  | 49901 | Negative |
| Cbx1          | NM_007622    | 11        | + | 96610246  | 96629727  | 50001 | Negative |
| Dcc           | NM_007831    | 18        | - | 71491611  | 72583420  | 50001 | Negative |
| Dlgh1         | NM_007862    | 16        | + | 30473410  | 30682713  | 50001 | Negative |
| Efna5         | NM_207654    | 17        | - | 60297718  | 60574961  | 50001 | Negative |
| Lhx2          | NM_010710    | 2         | + | 38283470  | 38301890  | 50001 | Negative |
| Ndrp1         | NM_010884    | 15        | - | 66953527  | 66993844  | 50001 | Negative |
| Nfil3         | NM_017373    | 13        | - | 51530723  | 51544552  | 50001 | Negative |
| Prrx1         | NM_011127    | 1         | - | 163163407 | 163227993 | 50001 | Negative |
| Prdx2         | NM_011563    | 8         | + | 84237800  | 84242986  | 50001 | Negative |
| Zic2          | NM_009574    | 14        | + | 117045015 | 117049406 | 50001 | Negative |
| Taf7          | NM_011901    | 18        | - | 37865744  | 37867869  | 50001 | Negative |
| Axl           | NM_009465    | 7         | - | 20922057  | 20953324  | 50001 | Negative |
| Zic5          | NM_022987    | 14        | - | 117028709 | 117035238 | 50001 | Negative |
| 2410012A13Rik | NM_023396    | 2         | - | 54009632  | 54011091  | 50001 | Negative |
| BC030477      | NM_177618    | 11        | + | 71476361  | 71515302  | 50001 | Negative |
| -             | BB534113     | 16        | - | 51367678  | 51368359  | 50001 | Negative |
| Egr2          | NM_010118    | 10        | + | 67591672  | 67595978  | 50001 | Negative |
| Sfrp2         | NM_009144    | 3         | + | 83502189  | 83510183  | 49997 | Negative |
| Spry2         | NM_011897    | 14        | - | 100435328 | 100439630 | 49984 | Negative |
| Zfh4          | NM_030708    | 3         | + | 5216397   | 5389233   | 50001 | Negative |
| Boc           | NM_172506    | 16        | - | 43368375  | 43441912  | 50001 | Negative |
| Pde2a         | NM_001008548 | 7         | + | 95527997  | 95619102  | 50001 | Negative |

|         |           |    |   |           |           |        |          |
|---------|-----------|----|---|-----------|-----------|--------|----------|
| Cart1   | NM_172553 | 10 | - | 102921768 | 102942802 | 50001  | Negative |
| Efemp1  | NM_146015 | 11 | + | 28762563  | 28821523  | 50001  | Negative |
| Cpeb2   | NM_175937 | 5  | + | 41990144  | 42042375  | 50001  | Negative |
| Pbx3    | NM_016768 | 2  | - | 34104071  | 34304198  | 50001  | Negative |
| Tcfap2a | NM_011547 | 13 | - | 40277825  | 40296013  | 50001  | Negative |
| Twist1  | NM_011658 | 12 | + | 30570330  | 30572488  | 50001  | Negative |
| Cntnap2 | NM_025771 | 6  | + | 47445151  | 47500249  | 50001  | Negative |
| Sox10   | BC023356  | 15 | - | 79206196  | 79215611  | 50001  | Negative |
| Gas1    | NM_008086 | 13 | - | 58831933  | 58834893  | 150001 | Negative |
| Zic1    | NM_009573 | 9  | - | 91251442  | 91256620  | 150001 | Negative |
| Zic3    | NM_009575 | X  | + | 52785357  | 52790617  | 150001 | Negative |
| Gli3    | NM_008130 | 13 | + | 14911831  | 15175564  | 150001 | Negative |
| Pax6    | NM_013627 | 2  | + | 105381207 | 105401822 | 150001 | Negative |
| Cdon    | NM_021339 | 9  | + | 35364530  | 35416802  | 150001 | Negative |
| Pax7    | NM_011039 | 4  | - | 138619342 | 138714229 | 150001 | Negative |

Genes were tiled over the range defined by the above coordinates. Coverage refers to the distance tiled (not including regions that were masked for repeats). Positive genes were upregulated by Hh signaling in transcriptional profiling studies, whereas negative genes were downregulated (combinations of genes in the HoxD cluster and Nkx2.1\_Nkx2.9\_Pax9 refer to additional loci that contained extensive tiling throughout the region).

**Table S2. Summary statistics of Gli1 ChIP peaks**

| Rank | Gene          | Peak   | Chr | Start     | End       | Size of region | Center    | T-Stat | FDR    | Fold change |
|------|---------------|--------|-----|-----------|-----------|----------------|-----------|--------|--------|-------------|
| 1    | Ptch1         | Peak 2 | 13  | 60949397  | 60950371  | 974            | 60949566  | 5.507  | 0      | 16.0503     |
| 2    | Nkx2-2        | Peak 1 | 2   | 146644626 | 146645570 | 944            | 146645242 | 5.144  | 0      | 12.8085     |
| 3    | Ptch1         | Peak 3 | 13  | 60951377  | 60952953  | 1576           | 60952201  | 4.8769 | 0      | 11.2259     |
| 4    | Nkx2-9        | Peak 1 | 12  | 53347310  | 53348354  | 1044           | 53347899  | 4.7249 | 0      | 6.9036      |
| 5    | Ptch1         | Peak 5 | 13  | 60956284  | 60956777  | 493            | 60956284  | 4.2212 | 0      | 7.1708      |
| 6    | Nkx2-9        | Peak 2 | 12  | 53340519  | 53341015  | 496            | 53340862  | 4.1573 | 0      | 4.1739      |
| 7    | Rab34         | Peak 1 | 11  | 77915220  | 77915560  | 340            | 77915220  | 4.0735 | 0      | 9.0651      |
| 8    | Ptch2         | Peak 1 | 4   | 116057320 | 116057946 | 626            | 116057561 | 3.9081 | 0      | 5.5392      |
| 9    | Ptch1         | Peak 1 | 13  | 60945578  | 60945972  | 394            | 60945972  | 3.8484 | 0      | 7.9795      |
| 10   | Nkx2.1        | Peak 1 | 12  | 53245748  | 53246351  | 603            | 53246120  | 3.7201 | 0      | 4.0266      |
| 11   | Gli1          | Peak 1 | 10  | 127076571 | 127078099 | 1528           | 127076975 | 3.4976 | 0      | 4.6198      |
| 12   | Hhip          | Peak 1 | 8   | 79270092  | 79270492  | 400            | 79270240  | 3.4535 | 0      | 4.9558      |
| 13   | Foxa2         | Peak 1 | 2   | 147493701 | 147494245 | 544            | 147493953 | 3.4405 | 0      | 3.1634      |
| 14   | Ptch2         | Peak 2 | 4   | 116054385 | 116054954 | 569            | 116054597 | 3.3145 | 0      | 3.9994      |
| 15   | Cart1         | Peak 1 | 10  | 102925949 | 102926177 | 228            | 102926042 | 3.116  | 0      | 3.559       |
| 16   | Ptch1         | Peak 4 | 13  | 60953950  | 60955072  | 1122           | 60954831  | 3.0549 | 0      | 3.8567      |
| 17   | Prdx2         | Peak 1 | 8   | 84215218  | 84215559  | 341            | 84215273  | 3.0089 | 0      | 4.0679      |
| 18   | Cart1         | Peak 2 | 10  | 102938208 | 102938208 | 0              | 102938208 | 2.9954 | 0      | 3.2221      |
| 19   | Ptch1         | Peak 6 | 13  | 61010241  | 61010714  | 473            | 61010369  | 2.9851 | 0      | 3.3462      |
| 20   | Hhip          | Peak 2 | 8   | 79268419  | 79268867  | 448            | 79268732  | 2.9702 | 0      | 4.4496      |
| 21   | Flrt3         | Peak 1 | 2   | 140191468 | 140191692 | 224            | 140191623 | 2.8017 | 0      | 3.5177      |
| 22   | Pax9          | Peak 1 | 12  | 53443055  | 53443311  | 256            | 53443186  | 2.7947 | 0      | 2.9971      |
| 23   | Ncor2         | Peak 1 | 5   | 124340743 | 124341009 | 266            | 124340909 | 2.7832 | 0.0435 | 3.5798      |
| 24   | Zic3          | Peak 1 | 20  | 52789693  | 52789967  | 274            | 52789693  | 2.6971 | 0.0769 | 2.6119      |
| 25   | Hand2         | Peak 1 | 8   | 56373391  | 56373692  | 301            | 56373552  | 2.6907 | 0.0769 | 2.7515      |
| 26   | Cart1         |        | 10  | 102963671 | 102964187 | 516            | 102963911 | 2.6876 | 0.0769 | 4.6047      |
| 27   | Twist1        |        | 12  | 30577542  | 30577932  | 390            | 30577763  | 2.6562 | 0.1034 | 4.3133      |
| 28   | Nkx2-9        |        | 12  | 53333143  | 53333408  | 265            | 53333313  | 2.6414 | 0.1034 | 3.5581      |
| 29   | Myf5          |        | 10  | 107361999 | 107362096 | 97             | 107362096 | 2.6329 | 0.1034 | 3.9894      |
| 30   | Ptn           |        | 6   | 36849581  | 36849581  | 0              | 36849581  | 2.5351 | 0.1667 | 3.5856      |
| 31   | Ncor2         |        | 5   | 124356413 | 124356633 | 220            | 124356540 | 2.4556 | 0.1818 | 3.1064      |
| 32   | Nkx2.1        |        | 12  | 53220111  | 53220111  | 0              | 53220111  | 2.3832 | 0.1818 | 2.9039      |
| 33   | Foxa2         |        | 2   | 147497880 | 147498001 | 121            | 147497880 | 2.3664 | 0.1818 | 3.2767      |
| 34   | Pax9          |        | 12  | 53399381  | 53399596  | 215            | 53399475  | 2.3388 | 0.1842 | 3.3657      |
| 35   | Ncor2         |        | 5   | 124346282 | 124346436 | 154            | 124346375 | 2.3308 | 0.1842 | 2.9774      |
| 36   | Ptch1         |        | 13  | 60955660  | 60955823  | 163            | 60955660  | 2.3207 | 0.1842 | 3.6777      |
| 37   | Foxf2         |        | 13  | 31129412  | 31129501  | 89             | 31129501  | 2.3084 | 0.1842 | 2.8392      |
| 38   | Mid1ip1       |        | 20  | 8973477   | 8973606   | 129            | 8973606   | 2.3043 | 0.1842 | 3.3893      |
| 39   | Nkx6-1        |        | 5   | 100666378 | 100666493 | 115            | 100666493 | 2.2766 | 0.2051 | 3.4918      |
| 40   | Ptch1         |        | 13  | 60946669  | 60946815  | 146            | 60946815  | 2.237  | 0.2128 | 2.8874      |
| 41   | Angpt16       |        | 9   | 20734531  | 20734687  | 156            | 20734531  | 2.222  | 0.2128 | 3.4968      |
| 42   | Foxc1         |        | 13  | 31302115  | 31302268  | 153            | 31302268  | 2.2081 | 0.2128 | 2.8619      |
| 43   | 5031439A09Rik |        | 3   | 158868339 | 158868516 | 177            | 158868516 | 2.2043 | 0.2128 | 2.9474      |
| 44   | Fabp7         |        | 10  | 58049170  | 58049170  | 0              | 58049170  | 2.2036 | 0.2128 | 2.8         |
| 45   | Dlgh1         |        | 16  | 30486849  | 30487046  | 197            | 30486849  | 2.1944 | 0.2128 | 2.7407      |
| 46   | Hhip          |        | 8   | 79267697  | 79267697  | 0              | 79267697  | 2.1859 | 0.2128 | 2.5583      |
| 47   | Pbx3          |        | 2   | 34297540  | 34297625  | 85             | 34297625  | 2.1846 | 0.2128 | 2.1798      |

Peaks were defined and ranked using TileMap. Using an FDR cut-off of  $\leq 25\%$ , there are a total of 47 peaks. Chromosomal coordinates (Build 34) showing the boundary coordinates for peaks. The size of the region is measured by subtracting these values. In the instances where the region has a size of zero, there is only one probe that is significantly enriched. The T-statistic gives the value for the highest peak probe in the region. FDR, false discovery rate.

**Table S3. Enrichment of Gli-binding motif in candidate regions**

| Peak Rank | n1/n2        | r1   | FDR(1/r1) | n3/n4       | r2/r3      |
|-----------|--------------|------|-----------|-------------|------------|
| 1-10      | 13/10820     | 5.33 | 19%       | 10/5328     | 7.73/17.34 |
| 11-20     | 11/9579      | 5.09 | 20%       | 8/4740      | 6.95/15.66 |
| 21-30     | 5/ 6280      | 3.53 | 28%       | 3/2720      | 4.54/8.96  |
| 31-40     | 4/ 4959      | 3.58 | 28%       | 1/1594      | 2.58/3.78  |
| 41-50     | 1/ 4919      | 0.9  | 100%      | 0/1826      | 0.00/0.00  |
| 51-60     | 2/ 4159      | 2.13 | 47%       | 2/1241      | 6.64/9.02  |
| Control   | 1264/5608267 | 1    |           | 299/1231633 | 1.00/1.00  |

The Gli consensus motif TGGGTGGTC, with a tolerance for 1 bp mismatch was mapped to statistically ranked peak regions. Peaks were grouped into bins of size 10. The number of Gli sites ( $n_1$ ) and the total number of surveyed non-repeat base pairs ( $n_2$ ) were counted for each bin as well as control regions (i.e. all regions tiled in the array).  $r_1 = (n_1/n_2)_{\text{target}} / (n_1/n_2)_{\text{control}}$  measures the Gli enrichment level for each bin.  $\text{FDR} = 1/r_1$  measures the false discovery rate of Gli-binding sites as predicted by consensus. Sites that reside within the top 10% of most-conserved regions of the genome are defined as conserved binding sites.  $n_3$  and  $n_4$  are the number of conserved Gli consensus sites and the total number of conserved base pairs in each bin, respectively.  $r_2 = (n_3/n_4)_{\text{target}} / (n_3/n_4)_{\text{control}}$  measures the extent to which Gli sites are enriched in conserved regions, and  $r_3 = (n_3/n_2)_{\text{target}} / (n_3/n_2)_{\text{control}}$  measures the combined gain we can obtain using both binding-sequence specificity and cross-species conservation information. The level of Gli enrichment ( $r_1$ ,  $r_2$  and  $r_3$ ) is reduced in lower-scoring regions

**Table S4. Validation with qPCR on unamplified ChIPs showing enrichment values, primers and coordinates**

| Primer        | Locus                      | Peak     | $\Delta\Delta C(T)$ | St. dev. | Fold enrichment | Amplicon coordinates    | Forward primer         | Reverse primer        |
|---------------|----------------------------|----------|---------------------|----------|-----------------|-------------------------|------------------------|-----------------------|
| 807808        | Ptch1                      | Peak1    | 4.91                | 0.8      | 30.0            | 13:60945711-60945972    | TTATAAAGCAGGTCCCCAAC   | ACGCATGTTTGCAAAGTAGA  |
| 727728        | Nkx2.2                     | Peak1    | 4.87                | 0.6      | 29.2            | 2:146645052-146645290   | CGGGTTTCTAGAGCCTTGTG   | GACAAAGGCTCCAACAGGA   |
| 801802        | Rab34                      | Peak1    | 4.81                | 0.6      | 28.1            | 11:77915199-77915431    | CAAAAGCTCCATTCTCACAA   | AGGAAACTGGGAGAACATCA  |
| 793794        | Nkx2.9                     | Peak1    | 4.01                | 0.7      | 16.2            | 12:53347646-53347851    | GAGTCTTAAATCGGGGATGA   | GAGACAATTTTCTGCCATC   |
| 731732        | Gli1                       | Peak1    | 3.65                | 0.6      | 12.5            | 10:127077945-127078145  | GGACAAAGAGACCTGGGACA   | AGGAGATGCTCTGACGCCTA  |
| 803804        | Nkx2.1                     | Peak1    | 3.18                | 0.6      | 9.1             | 12:53245985-53246192    | AATTGCTTAGGGTTCAGGTG   | TTTGTGAAGGCCTGTAGAA   |
| 879880        | Gli1                       | Peak1    | 2.85                | 0.7      | 7.2             | 10:127076806-127076959  | ATCCTGAAAGCAGGCAGTAG   | AGGAATCCAAGGTGCTCTCT  |
| 713714        | FoxA2                      | Peak1    | 2.68                | 0.6      | 6.4             | 2:147493520-147493736   | GGGGCCAGTCTAGATCTTC    | CACACCACAAAACACAGCA   |
| 777778        | Hhip1                      | Peak1    | 2.48                | 0.8      | 5.6             | 8:79,270,322-79,270,491 | CGCAGGAGCTGTTTACATGA   | AAGCCTGCAGTTGCAAGGT   |
| 799800        | Ptch2                      | Peak1    | 2.47                | 0.7      | 5.6             | 4:116057694-116057895   | GGTAGTCCCTGCAGTTATG    | TCAGCTCTCAACTCCATCAA  |
| 729730        | Gli1                       | Peak1    | 2.24                | 0.6      | 4.7             | 10:127077694-127077964  | CCACAGGTCAGGAGTCCAAT   | TGTCCCAGGTCTCTTTGTCC  |
| 855856        | Hand2                      | Peak1    | 1.45                | 0.8      | 2.7             | 8:56373405-56373599     | TTGGCTCTGTACTTTGTCTCA  | TAGAGGCTCCAGTCTTTTG   |
| 7918792       | Prdx2                      | Peak1    | 0.44                | 0.6      | 1.4             | 8:84215391-84215629     | TGAACACCCTGAATGAAATG   | TAGTAATGCCTTCCCCTCTG  |
| 833834        | Ptch2                      | Peak2    | 5.59                | 0.6      | 48.3            | 4:116054701-116054867   | ACTTACACTTGGCCAACGAC   | CGGATCCGTTGCTAGGTA    |
| 805806        | Nkx2.9                     | Peak2    | 5.24                | 0.6      | 37.7            | 12:53340854-53341077    | CTACCAAGCGTGCCTAAAGT   | TTTATCCCAGGGAGCTAAAG  |
| 711712        | Ptch1                      | Peak2    | 5.09                | 0.6      | 34.0            | 13:60949317-60949518    | GAAGTATTGCATGCGAGAGG   | CTGTCAGATGGCTTGGGTTT  |
| 841842        | Hhip1                      | Peak2    | 3.15                | 0.7      | 8.9             | 8:79268572-79268810     | TAAAAGGGCCACACTTGAAAA  | AATTGCTGCAGACCTTAAAT  |
| 795796        | Ptch1                      | Peak3    | 5.50                | 0.6      | 45.3            | 13:60952107-60952356    | CCAGGCTCTCTAACAAGC     | ACAACATTATCGTCTGGAAT  |
| 831832        | Ptch1                      | Peak4    | 3.17                | 0.8      | 9.0             | 13:60954689-60954893    | GAAGGACTCTGGGTGACAAC   | TTGGCTCCAGTACTTCAACA  |
| 797798        | Ptch1                      | Peak5    | 6.02                | 0.7      | 65.0            | 13:60956197-60956431    | ACAAAAGGAACGGAAAGTGT   | AGCACGTTCTCCAGTTTAC   |
| 829830        | Ptch1                      | Peak6    | 1.48                | 0.6      | 2.8             | 13:61010364-61010604    | GCAGGGTAATGGGATTTATG   | GTCTTCTGAAAGCCAAAA    |
| <u>825826</u> | Negative control           | Neg Ctrl | 1.32                | 0.7      | 2.5             | 7:133989909-133990158   | CAAGCTCCAGCCATTAAGTT   | GGTACTCAGTGTGCTTGCTG  |
| <u>861862</u> | Ptch1 locus Gli b.s. (-)   | Neg Ctrl | 2.28                | 0.6      | 4.8             | 13:60946932-60947110    | GGTAGTCCCTGCAGTTATG    | TCAGCTCTCAACTCCATCAA  |
| <u>863864</u> | Ptch1 locus Gli b.s. (-)   | Neg Ctrl | 1.09                | 0.7      | 2.1             | 13:60953479-60953701    | GGGCTTGACTCTTTCACAT    | ACTGTAAGCTCCTGGGTCTG  |
| <u>867868</u> | Nkx2.2 locus Gli b.s. (-)  | Neg Ctrl | 0.75                | 0.6      | 1.7             | 2:146647208-146647417   | ATCCAAGCTCTGAGTTGAGG   | AAGTGCCAAACAGGTCTCTC  |
| <u>859860</u> | Ptch1 locus Gli b.s. (-)   | Neg Ctrl | 0.67                | 0.7      | 1.6             | 13:60942920-60943069    | TCACCCTATCTTGAAAGC     | GTTGGGGAAATCAGTGAAAG  |
| <u>689690</u> | B-actin                    | Neg Ctrl | 0.44                | 2.8      | 1.4             | 5:141969468-141969691   | AGAAGGACTCCTATGTGGGTGA | ACTGACCTGGGTCACTTTTC  |
| <u>865866</u> | Ptch1 locus Gli b.s. (-)   | Neg Ctrl | 0.16                | 0.7      | 1.1             | 13:60958637-60958864    | TTCTTTGGAGCTCAATTTCC   | GTTTTCCCGATTTTAAAGT   |
| <u>811812</u> | Negative control region 2  | Neg Ctrl | 0.00                | 0.7      | 1.0             | 13:51535150-51535387    | CTGGCCTCCATACACACATA   | AGTCAGCAGGATCCACACTT  |
| <u>827828</u> | Negative control region 10 | Neg Ctrl | -0.14               | 0.7      | 0.9             | 15:66979588-66979802    | AGAGGTATGGCAGAGGTGAG   | CTTGGTGAGTCTTTGGGAAC  |
| <u>869870</u> | Nkx2-1 locus Gli b.s. (-)  | Neg Ctrl | -0.36               | 0.6      | 0.8             | 12:53255352-53255521    | ATTTCTTTTCTGGGAGGTC    | TAGGAGCTGGGTTTAAAGGTG |
| <u>875876</u> | Hhip1 locus Gli b.s. (-)   | Neg Ctrl | -0.51               | 0.8      | 0.7             | 8:79272744-79272928     | TGAGTTCGTTGGAGACTTT    | AGTCTGGGTGTACAGGTGTT  |
| <u>691692</u> | Rosa26                     | Neg Ctrl | -0.54               | 0.7      | 0.7             | 6:113638429-113638553   | CACCACAAATCGAGGCTGTA   | CCTGACGGGAGAGGTGATAG  |
| <u>809810</u> | Negative control region 1  | Neg Ctrl | -1.04               | 1.2      | 0.5             | 10:127016990-127017237  | AAGCCAGATGTGATGTAGCA   | TTATGGAAGGACAGACAGCA  |

All enrichment values are determined using primer pair 811-812 for baseline values. Negative controls (see 'Peak' column) fall into several categories: (i) loci referred to by name only are random loci that are not affected by Hh signalling; (ii) loci referred to as negative control refer to random tiled regions of the genome that were not enriched in the chip; (iii) loci containing 'Gli b.s.' contain a Gli site with no more than two deviations from consensus. This final class consists of Gli-like motifs that were adjacent to positive peak regions but which showed no ChIP enrichment in the microarray data set.

**Table S5. The 365 probe-sets exhibiting maximal differences in transcriptional profiling studies of EBs treated with retinoic acid and Hh agonist versus retinoic acid only**

| Rank | Probeset_id  | Score     | FDR      | Gene                           | Gene ID              | Accession                      |
|------|--------------|-----------|----------|--------------------------------|----------------------|--------------------------------|
| 1    | 1422284_at   | -1.80E+01 | 0.00E+00 | Nkx2-9                         | 18094                | NM_008701                      |
| 2    | 1451342_at   | -1.42E+01 | 0.00E+00 | Spon1                          | 233744               | NM_145584                      |
| 3    | 1455907_x_at | -1.37E+01 | 0.00E+00 | Phox2b                         | 18935                | NM_008888                      |
| 4    | 1416286_at   | -1.20E+01 | 0.00E+00 | Rgs4                           | 19736                | NM_009062                      |
| 5    | 1418054_at   | -1.14E+01 | 0.00E+00 | Neurod4                        | 11923                | NM_007501                      |
| 6    | 1422833_at   | -1.07E+01 | 1.25E-02 | Foxa2                          | 15376                | NM_010446                      |
| 7    | 1436694_s_at | -1.06E+01 | 1.25E-02 | Neurod4                        | 11923                | NM_007501                      |
| 8    | 1422720_at   | -1.04E+01 | 1.25E-02 | Isl1                           | 16392                | NM_021459                      |
| 9    | 1450723_at   | -9.60E+00 | 2.00E-02 | Isl1                           | 16392                | NM_021459                      |
| 10   | 1458536_at   | -9.07E+00 | 2.00E-02 | Ccni                           | 12453                | NM_017367                      |
| 11   | 1428741_at   | -8.99E+00 | 2.08E-02 | Elavl4                         | 15572                | NM_010488                      |
| 12   | 1425828_at   | -8.82E+00 | 2.08E-02 | Nkx6-1                         | 18096                | NM_144955                      |
| 13   | 1416287_at   | -8.38E+00 | 4.23E-02 | Rgs4                           | 19736                | NM_009062                      |
| 14   | 1452894_at   | -8.24E+00 | 4.29E-02 | Elavl4                         | 15572                | NM_010488                      |
| 15   | 1450258_a_at | -7.77E+00 | 5.33E-02 | Elavl4                         | 15572                | NM_010488                      |
| 16   | 1419549_at   | -7.47E+00 | 5.58E-02 | Arg1                           | 11846                | NM_007482                      |
| 17   | 1445047_at   | -7.39E+00 | 5.58E-02 | C79246                         | 96891                | --                             |
| 18   | 1448475_at   | -7.21E+00 | 5.58E-02 | Olfml3                         | 99543                | NM_133859                      |
| 19   | 1416232_at   | -7.17E+00 | 5.58E-02 | Olig2                          | 50913                | NM_016967                      |
| 20   | 1426255_at   | -7.16E+00 | 5.58E-02 | Nefl                           | 18039                | NM_010910                      |
| 21   | 1415885_at   | -7.11E+00 | 5.58E-02 | Chgb                           | 12653                | NM_007694                      |
| 22   | 1433906_at   | -7.07E+00 | 5.58E-02 | 4933402J24Rik                  | 74438                | NM_028940                      |
| 23   | 1436319_at   | -6.94E+00 | 5.58E-02 | Sulf1                          | 240725               | NM_172294                      |
| 24   | 1422520_at   | -6.85E+00 | 5.58E-02 | Nef3                           | 18040                | NM_008691                      |
| 25   | 1440056_at   | -6.79E+00 | 5.58E-02 | --                             | --                   | --                             |
| 26   | 1423977_at   | -6.79E+00 | 5.58E-02 | 4930453N24Rik                  | 67609                | XM_148353                      |
| 27   | 1458140_at   | -6.75E+00 | 5.93E-02 | Slit2                          | 20563                | NM_178804                      |
| 28   | 1460000_at   | -6.68E+00 | 6.25E-02 | D830007B15Rik                  | 330096               | XM_485619                      |
| 29   | 1459852_x_at | -6.54E+00 | 6.71E-02 | Trib2                          | 217410               | NM_144551                      |
| 30   | 1447709_at   | -6.44E+00 | 6.71E-02 | Epb4.1l3                       | 13823                | NM_013813                      |
| 31   | 1425412_at   | -6.34E+00 | 6.71E-02 | Cias1                          | 216799               | NM_145827                      |
| 32   | 1416149_at   | -6.31E+00 | 6.71E-02 | Olig1                          | 50914                | NM_016968                      |
| 33   | 1423281_at   | -6.25E+00 | 6.71E-02 | Stmn2                          | 20257                | NM_025285                      |
| 34   | 1460181_at   | -6.24E+00 | 6.71E-02 | Stmn3                          | 20262                | NM_009133                      |
| 35   | 1454672_at   | -6.19E+00 | 6.71E-02 | --                             | --                   | --                             |
| 36   | 1452842_at   | -6.07E+00 | 7.22E-02 | Hspb9                          | 75482                | --                             |
| 37   | 1459524_at   | -5.99E+00 | 7.57E-02 | Mcc                            | 328949               | XM_140309                      |
| 38   | 1436359_at   | -5.94E+00 | 7.89E-02 | Ret                            | 19713                | NM_009050                      |
| 39   | 1451990_at   | -5.89E+00 | 8.26E-02 | Mapre2                         | 212307               | NM_153058                      |
| 40   | 1455865_at   | -5.86E+00 | 8.26E-02 | Insm1                          | 53626                | NM_016889                      |
| 41   | 1438989_s_at | -5.86E+00 | 8.26E-02 | B130021B11Rik                  | 320860               | --                             |
| 42   | 1418620_at   | -5.83E+00 | 8.26E-02 | Phox2a                         | 11859                | NM_008887                      |
| 43   | 1438200_at   | -5.81E+00 | 8.26E-02 | Sulf1                          | 240725               | NM_172294                      |
| 44   | 1415999_at   | -5.60E+00 | 1.05E-01 | Hey1                           | 15213                | NM_010423                      |
| 45   | 1457403_at   | -5.48E+00 | 1.16E-01 | --                             | --                   | --                             |
| 46   | 1436287_at   | -5.46E+00 | 1.18E-01 | --                             | --                   | --                             |
| 47   | 1416313_at   | -5.42E+00 | 1.18E-01 | Mllt11                         | 56772                | NM_019914                      |
| 48   | 1425078_x_at | -5.42E+00 | 1.18E-01 | 5830484A20Rik ///<br>LOC546062 | 109032 ///<br>546062 | NM_175397 ///<br>XM_620658     |
| 49   | 1423537_at   | -5.39E+00 | 1.22E-01 | Gap43                          | 14432                | NM_008083                      |
| 50   | 1421399_at   | -5.36E+00 | 1.23E-01 | Insm1                          | 53626                | NM_016889                      |
| 51   | 1458229_at   | -5.23E+00 | 1.40E-01 | Robo2                          | 268902               | NM_175549                      |
| 52   | 1449468_at   | -5.21E+00 | 1.40E-01 | St6galnac5                     | 26938                | NM_012028                      |
| 53   | 1442710_at   | -5.15E+00 | 1.53E-01 | Pdlim5                         | 56376                | NM_019808 ///<br>NM_019809 /// |

|     |              |           |          |                 |           |                  |
|-----|--------------|-----------|----------|-----------------|-----------|------------------|
| 54  | 1450492_at   | -5.11E+00 | 1.57E-01 | Cngb3           | 30952     | NM_022554        |
| 55  | 1459941_at   | -5.09E+00 | 1.57E-01 | 4933402J24Rik   | 74438     | NM_013927        |
| 56  | 1438258_at   | -5.04E+00 | 1.57E-01 | Vldlr           | 22359     | NM_028940        |
| 57  | 1454660_at   | -5.02E+00 | 1.57E-01 | 1100001E04Rik   | 75404     | NM_013703        |
| 58  | 1453916_at   | -5.01E+00 | 1.57E-01 | 4933431K23Rik   | 74475     | XM_135854        |
| 59  | 1426864_a_at | -5.00E+00 | 1.57E-01 | Ncam1           | 17967     | --               |
| 60  | 1425928_at   | -4.99E+00 | 1.57E-01 | Xkr6            | 219149    | NM_010875        |
| 61  | 1442180_at   | -4.93E+00 | 1.57E-01 | Dleu7           | 239133    | NM_173393        |
| 62  | 1437558_at   | -4.92E+00 | 1.57E-01 | B130021B11Rik   | 320860    | NM_173419        |
| 63  | 1456002_at   | -4.92E+00 | 1.57E-01 | Xpa             | 22590     | --               |
| 64  | 1458275_at   | -4.91E+00 | 1.57E-01 | 2310045A20Rik   | 231238    | NM_011728        |
| 65  | 1450683_at   | -4.89E+00 | 1.57E-01 | Tagln3          | 56370     | NM_172710        |
| 66  | 1454245_at   | -4.88E+00 | 1.57E-01 | Csmd3           | 239420    | NM_019754        |
| 67  | 1445279_at   | -4.88E+00 | 1.57E-01 | BC034902        | 228642    | XM_139502        |
| 68  | 1440839_x_at | -4.87E+00 | 1.57E-01 | 1700065I16Rik   | 78462     | NM_177654        |
| 69  | 1460083_at   | -4.84E+00 | 1.58E-01 | Adam10          | 11487     | --               |
| 70  | 1437191_at   | -4.84E+00 | 1.58E-01 | BC050789        | 213234    | NM_007399        |
| 71  | 1421958_at   | -4.83E+00 | 1.58E-01 | L1cam           | 16728     | NM_172515        |
| 72  | 1422232_at   | -4.78E+00 | 1.63E-01 | Phox2b          | 18935     | NM_008478        |
| 73  | 1437467_at   | -4.77E+00 | 1.63E-01 | Alcam           | 11658     | NM_008888        |
| 74  | 1448628_at   | -4.71E+00 | 1.73E-01 | Scg3            | 20255     | NM_009655        |
| 75  | 1435396_at   | -4.68E+00 | 1.74E-01 | C85317          | 97823     | NM_009130        |
| 76  | 1455123_at   | -4.68E+00 | 1.74E-01 | St18            | 240690    | --               |
| 77  | 1421359_at   | -4.67E+00 | 1.74E-01 | Ret             | 19713     | NM_173868        |
| 78  | 1459249_at   | -4.64E+00 | 1.80E-01 | Tdrd3           | 219249    | NM_009050        |
| 79  | 1452123_s_at | -4.62E+00 | 1.82E-01 | Frmd4b          | 232288    | NM_172605        |
| 80  | 1436931_at   | -4.60E+00 | 1.82E-01 | Rfx4            | 71137     | NM_145148        |
| 81  | 1418415_at   | -4.59E+00 | 1.82E-01 | Hoxb5           | 15413     | NM_001024918 /// |
| 82  | 1446144_at   | -4.58E+00 | 1.82E-01 | Pex2            | 58869     | NM_027689        |
| 83  | 1426865_a_at | -4.56E+00 | 1.83E-01 | Ncam1           | 17967     | NM_008268        |
| 84  | 1420484_a_at | -4.54E+00 | 1.86E-01 | Vtn             | 22370     | NM_021483        |
| 85  | 1448289_at   | -4.53E+00 | 1.89E-01 | Crmp1           | 12933     | NM_010875        |
| 86  | 1418452_at   | -4.51E+00 | 1.92E-01 | Gng2            | 14702     | NM_011707        |
| 87  | 1452010_at   | -4.49E+00 | 1.94E-01 | Chrna3          | 110834    | NM_007765        |
| 88  | 1427867_at   | -4.48E+00 | 1.97E-01 | Myh1            | 17879     | NM_010315        |
| 89  | 1440005_at   | -4.46E+00 | 1.98E-01 | C730009D12      | 328974    | NM_145129        |
| 90  | 1442893_at   | -4.45E+00 | 2.00E-01 | Lrrtm1          | 74342     | XM_354615        |
| 91  | 1457146_at   | -4.39E+00 | 2.17E-01 | Dock4           | 238130    | --               |
| 92  | 1459613_at   | -4.37E+00 | 2.17E-01 | --              | --        | NM_028880        |
| 93  | 1435165_at   | -4.37E+00 | 2.17E-01 | Cntn2           | 21367     | NM_172803        |
| 94  | 1441163_at   | -4.36E+00 | 2.17E-01 | Med12l          | 329650    | NM_011531 ///    |
| 95  | 1457399_at   | -4.34E+00 | 2.20E-01 | --              | --        | NM_177129        |
| 96  | 1452357_at   | -4.33E+00 | 2.20E-01 | Gp1bb /// Sept5 | 14724 /// | NM_001001999 /// |
| 97  | 1448759_at   | -4.31E+00 | 2.27E-01 | Il2rb           | 16185     | NM_010327 ///    |
| 98  | 1450661_x_at | -4.29E+00 | 2.27E-01 | Nfic            | 18029     | NM_213614        |
| 99  | 1431045_at   | -4.29E+00 | 2.27E-01 | D12Ertd553e     | 76820     | NM_008368        |
| 100 | 1447586_at   | -4.28E+00 | 2.27E-01 | Cspg2           | 13003     | NM_008688        |
| 101 | 1418105_at   | -4.28E+00 | 2.27E-01 | Stmn4           | 56471     | NM_029758        |
| 102 | 1418451_at   | -4.28E+00 | 2.27E-01 | Gng2            | 14702     | XM_488510        |
| 103 | 1436557_at   | -4.27E+00 | 2.27E-01 | Kb36            | 223915    | NM_019675        |
| 104 | 1418877_at   | -4.26E+00 | 2.27E-01 | Foxd1           | 15229     | NM_010315        |
| 105 | 1423506_a_at | -4.25E+00 | 2.28E-01 | Nnat            | 18111     | NM_212485        |
| 106 | 1422839_at   | -4.25E+00 | 2.28E-01 | Neurog2         | 11924     | NM_008242        |
|     |              |           |          |                 |           | NM_010923 ///    |
|     |              |           |          |                 |           | NM_180960        |
|     |              |           |          |                 |           | NM_009718        |



|     |              |           |          |               |        |               |
|-----|--------------|-----------|----------|---------------|--------|---------------|
| 107 | 1435195_at   | -4.24E+00 | 2.28E-01 | D930046M13Rik | 104880 | --            |
| 108 | 1452399_at   | -4.22E+00 | 2.28E-01 | Rgs6          | 50779  | NM_015812     |
| 109 | 1439789_at   | -4.22E+00 | 2.28E-01 | --            | --     | --            |
| 110 | 1459929_at   | -4.22E+00 | 2.28E-01 | C80731        | 243905 | XM_145503     |
| 111 | 1442553_at   | -4.20E+00 | 2.29E-01 | Mapre2        | 212307 | NM_153058     |
| 112 | 1422401_at   | -4.20E+00 | 2.29E-01 | Sprr3         | 20766  | NM_011478     |
| 113 | 1442675_at   | -4.19E+00 | 2.29E-01 | 2300006M17Rik | 69466  | --            |
| 114 | 1433551_at   | -4.18E+00 | 2.29E-01 | AI427515      | 270097 | NM_173016     |
| 115 | 1453300_at   | -4.17E+00 | 2.29E-01 | Slc35d2       | 70484  | NM_001001321  |
| 116 | 1436148_at   | -4.17E+00 | 2.29E-01 | --            | --     | --            |
| 117 | 1416646_at   | -4.16E+00 | 2.30E-01 | Afp           | 11576  | NM_007423     |
| 118 | 1432516_at   | -4.15E+00 | 2.30E-01 | 4930447F04Rik | 74862  | XM_135902     |
| 119 | 1458306_at   | -4.15E+00 | 2.30E-01 | F630022B06Rik | 239827 | NM_172822     |
| 120 | 1447929_at   | -4.09E+00 | 2.53E-01 | Ssh3          | 245857 | NM_198113     |
| 121 | 1442257_at   | -4.08E+00 | 2.53E-01 | --            | --     | --            |
| 122 | 1426215_at   | -4.06E+00 | 2.59E-01 | Ddc           | 13195  | NM_016672     |
| 123 | 1425111_at   | -4.05E+00 | 2.59E-01 | Sorcs3        | 66673  | NM_025696     |
| 124 | 1448944_at   | -4.04E+00 | 2.59E-01 | Nrp1          | 18186  | NM_008737     |
| 125 | 1428157_at   | -4.03E+00 | 2.59E-01 | Gng2          | 14702  | NM_010315     |
| 126 | 1438036_x_at | -4.02E+00 | 2.59E-01 | AW061290      | 381110 | NM_201361     |
| 127 | 1435941_at   | -4.02E+00 | 2.59E-01 | Rhbdl4        | 246104 | NM_139228     |
| 128 | 1454110_at   | -4.01E+00 | 2.59E-01 | 4930408K08Rik | 76865  | --            |
| 129 | 1440256_at   | -4.01E+00 | 2.59E-01 | Rgs9bp        | 243923 | NM_145840     |
| 130 | 1455027_at   | -4.00E+00 | 2.62E-01 | D5Bwg0860e    | 52822  | NM_027530     |
| 131 | 1456121_at   | -4.00E+00 | 2.63E-01 | Lrriq2        | 74201  | NM_028815     |
| 132 | 1455447_at   | -3.99E+00 | 2.63E-01 | D430019H16Rik | 268595 | --            |
| 133 | 1455033_at   | -3.97E+00 | 2.69E-01 | B430201A12Rik | 329739 | XM_283903     |
| 134 | 1442230_at   | -3.96E+00 | 2.69E-01 | --            | --     | --            |
| 135 | 1453351_at   | -3.95E+00 | 2.70E-01 | Tbx20         | 57246  | NM_020496 /// |
|     |              |           |          |               |        | NM_194263     |
| 136 | 1448233_at   | -3.93E+00 | 2.75E-01 | Prnp          | 19122  | NM_011170     |
| 137 | 1417280_at   | -3.92E+00 | 2.76E-01 | Slc17a1       | 20504  | NM_009198     |
| 138 | 1445737_at   | -3.91E+00 | 2.76E-01 | 1700057H21Rik | 73375  | --            |
| 139 | 1418055_at   | -3.90E+00 | 2.78E-01 | Neurod4       | 11923  | NM_007501     |
| 140 | 1431556_at   | -3.89E+00 | 2.78E-01 | 4930435M08Rik | 74651  | --            |
| 141 | 1444080_at   | -3.89E+00 | 2.78E-01 | E430014L09Rik | 320937 | --            |
| 142 | 1420662_at   | -3.87E+00 | 2.82E-01 | 4933439F18Rik | 66771  | NM_025757     |
| 143 | 1417988_at   | -3.86E+00 | 2.82E-01 | Resp18        | 19711  | NM_009049     |
| 144 | 1454449_at   | -3.86E+00 | 2.82E-01 | Rabepk        | 227746 | NM_145522     |
| 145 | 1415978_at   | -3.85E+00 | 2.82E-01 | Tubb3         | 22152  | NM_023279     |
| 146 | 1454974_at   | -3.84E+00 | 2.82E-01 | Ntn1          | 18208  | NM_008744     |
| 147 | 1440422_at   | -3.84E+00 | 2.82E-01 | Htr1f         | 15557  | NM_008310     |
| 148 | 1424403_a_at | -3.84E+00 | 2.82E-01 | D5Bwg0860e    | 52822  | NM_027530     |
| 149 | 1458793_at   | -3.82E+00 | 2.90E-01 | --            | --     | --            |
| 150 | 1424719_a_at | -3.82E+00 | 2.90E-01 | Mapt          | 17762  | NM_010838     |
| 151 | 1428156_at   | -3.81E+00 | 2.93E-01 | Gng2          | 14702  | NM_010315     |
| 152 | 1448991_a_at | -3.81E+00 | 2.93E-01 | Ina           | 226180 | NM_146100     |
| 153 | 1455266_at   | -3.80E+00 | 2.94E-01 | Kif5c         | 16574  | NM_008449     |
| 154 | 1434670_at   | -3.79E+00 | 2.94E-01 | Kif5a         | 16572  | NM_008447     |
| 155 | 1430222_at   | -3.78E+00 | 2.94E-01 | 9130007G19Rik | 74550  | --            |
| 156 | 1442613_at   | -3.78E+00 | 2.94E-01 | Spon1         | 233744 | NM_145584     |
| 157 | 1416301_a_at | -3.76E+00 | 2.94E-01 | Ebf1          | 13591  | NM_007897     |
| 158 | 1443086_at   | -3.76E+00 | 2.94E-01 | Alcam         | 11658  | NM_009655     |
| 159 | 1443855_at   | -3.76E+00 | 2.94E-01 | Kcnc1         | 16502  | NM_008421     |
| 160 | 1435323_a_at | -3.76E+00 | 2.94E-01 | Oact1         | 218121 | NM_153546     |
| 161 | 1431484_at   | -3.75E+00 | 2.96E-01 | 2010007L08Rik | 70114  | --            |
| 162 | 1450779_at   | -3.73E+00 | 3.03E-01 | Fabp7         | 12140  | NM_021272     |
| 163 | 1459760_at   | -3.71E+00 | 3.13E-01 | Ndufs4        | 17993  | NM_010887     |

|     |              |           |          |               |        |                            |
|-----|--------------|-----------|----------|---------------|--------|----------------------------|
| 164 | 1440264_at   | -3.70E+00 | 3.16E-01 | --            | --     | --                         |
| 165 | 1443723_at   | -3.70E+00 | 3.16E-01 | Trpm3         | 226025 | NM_177341                  |
| 166 | 1448250_at   | -3.70E+00 | 3.16E-01 | 9030425E11Rik | 71566  | NM_133733                  |
| 167 | 1450397_at   | -3.69E+00 | 3.16E-01 | Mtap1b        | 17755  | NM_008634                  |
| 168 | 1459840_s_at | -3.69E+00 | 3.16E-01 | Ccdc28b       | 66264  | NM_025455                  |
| 169 | 1438607_at   | -3.68E+00 | 3.16E-01 | Zdhhc19       | 245308 | NM_199309                  |
| 170 | 1446300_at   | -3.68E+00 | 3.16E-01 | --            | --     | --                         |
| 171 | 1429816_at   | -3.68E+00 | 3.16E-01 | Armc3         | 70882  | XM_130012 ///<br>XM_622876 |
| 172 | 1441118_at   | -3.67E+00 | 3.17E-01 | BC017647      | 216971 | NM_145430                  |
| 173 | 1432591_at   | -3.66E+00 | 3.25E-01 | Pappa         | 18491  | NM_021362                  |
| 174 | 1422586_at   | -3.64E+00 | 3.31E-01 | Ecel1         | 13599  | NM_021306                  |
| 175 | 1440991_at   | -3.63E+00 | 3.36E-01 | Plekhg1       | 213783 | XM_136911                  |
| 176 | 1417625_s_at | -3.63E+00 | 3.37E-01 | Cmkor1        | 12778  | NM_007722                  |
| 177 | 1448099_at   | -3.62E+00 | 3.37E-01 | --            | 432995 | XM_488763                  |
| 178 | 1433776_at   | -3.62E+00 | 3.37E-01 | Lhfp          | 108927 | NM_175386                  |
| 179 | 1459186_at   | -3.61E+00 | 3.39E-01 | C80165        | 97726  | --                         |
| 180 | 1419524_at   | -3.61E+00 | 3.39E-01 | Tph1          | 21990  | NM_009414                  |
| 181 | 1435321_at   | -3.60E+00 | 3.40E-01 | 3732412D22Rik | 77569  | NM_001001980               |
| 182 | 1435404_at   | -3.60E+00 | 3.40E-01 | Disp2         | 214240 | NM_170593                  |
| 183 | 1446237_at   | -3.59E+00 | 3.45E-01 | Akap9         | 100986 | NM_194462                  |
| 184 | 1442347_at   | -3.59E+00 | 3.45E-01 | Lrp8          | 16975  | NM_053073                  |
| 185 | 1415844_at   | -3.57E+00 | 3.52E-01 | Syt4          | 20983  | NM_009308                  |
| 186 | 1438042_at   | -3.56E+00 | 3.52E-01 | Shox2         | 20429  | NM_013665                  |
| 187 | 1435142_at   | -3.56E+00 | 3.52E-01 | Sft2d2        | 108735 | NM_145512                  |
| 188 | 1459702_at   | -3.54E+00 | 3.55E-01 | --            | --     | --                         |
| 189 | 1457762_at   | -3.54E+00 | 3.55E-01 | Ttc15         | 217449 | NM_178811                  |
| 190 | 1423713_at   | -3.54E+00 | 3.55E-01 | Abcb8         | 74610  | NM_029020                  |
| 191 | 1456198_at   | -3.54E+00 | 3.55E-01 | 1810007D17Rik | 69055  | --                         |
| 192 | 1439795_at   | -3.54E+00 | 3.57E-01 | Gpr64         | 237175 | NM_178712                  |
| 193 | 1455037_at   | -3.53E+00 | 3.57E-01 | Plxna2        | 18845  | NM_008882                  |
| 194 | 1435408_at   | -3.53E+00 | 3.57E-01 | --            | --     | --                         |
| 195 | 1419672_at   | -3.52E+00 | 3.59E-01 | Spock1        | 20745  | NM_009262                  |
| 196 | 1423280_at   | -3.52E+00 | 3.59E-01 | Stmn2         | 20257  | NM_025285                  |
| 197 | 1456206_at   | -3.52E+00 | 3.59E-01 | 1810020C19Rik | 69113  | XM_130317                  |
| 198 | 1439286_at   | -3.51E+00 | 3.59E-01 | Grik2         | 14806  | NM_010349                  |
| 199 | 1438169_a_at | -3.51E+00 | 3.60E-01 | Frmd4b        | 232288 | NM_145148                  |
| 200 | 1445215_at   | -3.50E+00 | 3.60E-01 | 2600003E23Rik | 70292  | NM_027373                  |
| 201 | 1416713_at   | -3.50E+00 | 3.60E-01 | 2700055K07Rik | 67971  | NM_026481                  |
| 202 | 1442428_at   | -3.46E+00 | 3.78E-01 | --            | --     | --                         |
| 203 | 1446324_at   | -3.45E+00 | 3.79E-01 | --            | --     | --                         |
| 204 | 1439663_at   | -3.45E+00 | 3.79E-01 | Ptch1         | 19206  | NM_008957                  |
| 205 | 1457260_at   | -3.45E+00 | 3.79E-01 | --            | --     | --                         |
| 206 | 1423274_at   | -3.43E+00 | 3.84E-01 | Ddx26         | 18130  | NM_008715                  |
| 207 | 1418178_at   | -3.43E+00 | 3.84E-01 | Ina           | 226180 | NM_146100                  |
| 208 | 1445227_at   | -3.43E+00 | 3.84E-01 | Tnfsf13       | 69583  | NM_023517                  |
| 209 | 1419420_at   | -3.42E+00 | 3.86E-01 | St6galnac5    | 26938  | NM_012028                  |
| 210 | 1428136_at   | -3.41E+00 | 3.88E-01 | Sfrp1         | 20377  | NM_013834                  |
| 211 | 1441764_at   | -3.40E+00 | 3.88E-01 | Prdm10        | 382066 | XM_356146                  |
| 212 | 1429474_at   | -3.40E+00 | 3.88E-01 | Zadh1         | 77219  | NM_029880                  |
| 213 | 1421851_at   | -3.40E+00 | 3.88E-01 | Mtap1b        | 17755  | NM_008634                  |
| 214 | 1429019_s_at | -3.40E+00 | 3.88E-01 | Pon2          | 330260 | NM_183308                  |
| 215 | 1421739_a_at | -3.40E+00 | 3.88E-01 | Matk          | 17179  | NM_010768                  |
| 216 | 1434502_x_at | -3.40E+00 | 3.88E-01 | Slc4a1        | 20533  | NM_011403                  |
| 217 | 1450686_at   | -3.39E+00 | 3.88E-01 | Pon2          | 330260 | NM_183308                  |
| 218 | 1444212_at   | -3.38E+00 | 3.90E-01 | Hip2          | 53323  | NM_016786                  |
| 219 | 1442638_at   | -3.38E+00 | 3.90E-01 | --            | --     | --                         |
| 220 | 1437086_at   | -3.37E+00 | 3.93E-01 | Ascl1         | 17172  | NM_008553                  |

|     |              |           |          |               |        |                  |
|-----|--------------|-----------|----------|---------------|--------|------------------|
| 221 | 1443809_at   | -3.36E+00 | 3.93E-01 | Ptn           | 19242  | NM_008973        |
| 222 | 1443372_at   | -3.36E+00 | 3.93E-01 | Chat          | 12647  | NM_009891        |
| 223 | 1416359_at   | -3.36E+00 | 3.97E-01 | Snag1         | 170625 | NM_130796        |
| 224 | 1454507_at   | -3.35E+00 | 4.00E-01 | 8430432A02Rik | 71524  | --               |
| 225 | 1417871_at   | -3.35E+00 | 4.01E-01 | Hsd17b7       | 15490  | NM_010476        |
| 226 | 1441440_at   | -3.34E+00 | 4.01E-01 | Apg4c         | 242557 | NM_175029        |
| 227 | 1426442_at   | -3.34E+00 | 4.01E-01 | Gpm6a         | 234267 | NM_153581        |
| 228 | 1455090_at   | -3.34E+00 | 4.03E-01 | Angptl2       | 26360  | NM_011923        |
| 229 | 1450164_at   | -3.33E+00 | 4.03E-01 | Ascl1         | 17172  | NM_008553        |
| 230 | 1457600_x_at | -3.33E+00 | 4.03E-01 | --            | --     | --               |
| 231 | 1423091_a_at | -3.33E+00 | 4.03E-01 | Gpm6b         | 14758  | NM_023122        |
| 232 | 1434828_at   | -3.32E+00 | 4.03E-01 | B430201A12Rik | 329739 | XM_283903        |
| 233 | 1442269_at   | -3.32E+00 | 4.03E-01 | Seh1l         | 72124  | NM_028112        |
| 234 | 1455874_at   | -3.32E+00 | 4.03E-01 | 1810059G22Rik | 67706  | NM_026325        |
| 235 | 1429978_at   | -3.32E+00 | 4.03E-01 | 5830467E07Rik | 76107  | --               |
| 236 | 1426551_at   | -3.32E+00 | 4.03E-01 | Sidt1         | 320007 | NM_198034        |
| 237 | 1459355_at   | -3.31E+00 | 4.03E-01 | Tgfb3         | 21814  | NM_011578        |
| 238 | 1448961_at   | -3.31E+00 | 4.03E-01 | Plscr2        | 18828  | NM_008880        |
| 239 | 1426045_at   | -3.31E+00 | 4.03E-01 | Kng1          | 16644  | NM_023125        |
| 240 | 1424402_at   | -3.31E+00 | 4.03E-01 | D5Bwg0860e    | 52822  | NM_027530        |
| 241 | 1450438_at   | -3.30E+00 | 4.04E-01 | Ncam1         | 17967  | NM_010875        |
| 242 | 1419009_at   | -3.30E+00 | 4.08E-01 | Actl7a        | 11470  | NM_009611        |
| 243 | 1459028_at   | -3.29E+00 | 4.11E-01 | 3830408P06Rik | 70683  | XM_125867        |
| 244 | 1421712_at   | -3.28E+00 | 4.11E-01 | Sele          | 20339  | NM_011345        |
| 245 | 1456551_at   | -3.27E+00 | 4.17E-01 | --            | --     | --               |
| 246 | 1447389_at   | -3.26E+00 | 4.20E-01 | Al662168      | 102573 | --               |
| 247 | 1441017_at   | -3.26E+00 | 4.20E-01 | Zcchc14       | 142682 | NM_080855        |
| 248 | 1446355_at   | -3.26E+00 | 4.20E-01 | 9530085L11Rik | 320362 | --               |
| 249 | 1445672_at   | -3.26E+00 | 4.20E-01 | --            | --     | --               |
| 250 | 1448895_a_at | -3.25E+00 | 4.26E-01 | Ctnna2        | 12386  | NM_009819 ///    |
|     |              |           |          |               |        | NM_145732        |
| 251 | 1425784_a_at | -3.24E+00 | 4.27E-01 | Olfm1         | 56177  | NM_019498        |
| 252 | 1417381_at   | -3.24E+00 | 4.29E-01 | C1qa          | 12259  | NM_007572        |
| 253 | 1432873_at   | -3.24E+00 | 4.29E-01 | 4932702M13Rik | 74418  | --               |
| 254 | 1442619_at   | -3.23E+00 | 4.30E-01 | Klf15         | 66277  | NM_023184        |
| 255 | 1453926_at   | -3.23E+00 | 4.30E-01 | Rad54l        | 19366  | NM_009015        |
| 256 | 1440525_at   | -3.22E+00 | 4.30E-01 | Acvr2b        | 11481  | NM_007397        |
| 257 | 1429651_at   | -3.22E+00 | 4.30E-01 | Phactr3       | 74189  | NM_001007154 /// |
|     |              |           |          |               |        | NM_028806        |
| 258 | 1423287_at   | -3.22E+00 | 4.30E-01 | Cbln1         | 12404  | NM_019626        |
| 259 | 1449757_x_at | -3.22E+00 | 4.30E-01 | Dntt          | 21673  | NM_009345        |
| 260 | 1457979_at   | -3.22E+00 | 4.30E-01 | --            | --     | --               |
| 261 | 1447497_at   | -3.21E+00 | 4.30E-01 | Rab21         | 216344 | NM_024454        |
| 262 | 1440402_at   | -3.21E+00 | 4.30E-01 | 4831426l19Rik | 212073 | NM_172500        |
| 263 | 1436815_x_at | -3.20E+00 | 4.31E-01 | --            | --     | --               |
| 264 | 1445168_at   | -3.20E+00 | 4.31E-01 | --            | --     | --               |
| 265 | 1436470_at   | -3.20E+00 | 4.31E-01 | Rims2         | 116838 | NM_053271        |
| 266 | 1421946_at   | -3.19E+00 | 4.33E-01 | Crp           | 12944  | NM_007768        |
| 267 | 1421898_a_at | -3.18E+00 | 4.33E-01 | Mr1           | 15064  | NM_008209        |
| 268 | 1420432_at   | -3.18E+00 | 4.33E-01 | Tas1r1        | 110326 | NM_031867        |
| 269 | 1460383_at   | -3.18E+00 | 4.33E-01 | Gnao1         | 14681  | NM_010308        |
| 270 | 1421605_a_at | -3.18E+00 | 4.33E-01 | Aqp9          | 64008  | NM_022026        |
| 271 | 1440304_at   | -3.18E+00 | 4.33E-01 | BB214985      | 100485 | --               |
| 272 | 1452537_at   | -3.17E+00 | 4.33E-01 | Igk-V1        | 16081  | --               |
| 273 | 1449925_at   | -3.16E+00 | 4.33E-01 | Cxcr3         | 12766  | NM_009910        |
| 274 | 1419746_at   | -3.16E+00 | 4.33E-01 | Arhgap23      | 58996  | NM_021493        |
| 275 | 1458519_at   | -3.16E+00 | 4.33E-01 | --            | --     | --               |
| 276 | 1440820_x_at | -3.16E+00 | 4.33E-01 | Tmco2         | 69469  | --               |
| 277 | 1457008_at   | -3.16E+00 | 4.33E-01 | Chrn4         | 108015 | NM_148944        |

|     |              |           |          |                                       |                                   |                                                                       |
|-----|--------------|-----------|----------|---------------------------------------|-----------------------------------|-----------------------------------------------------------------------|
| 278 | 1427866_x_at | -3.16E+00 | 4.33E-01 | Hbb                                   | 15127                             | XM_489729                                                             |
| 279 | 1432006_at   | -3.16E+00 | 4.33E-01 | Ap2a2                                 | 11772                             | NM_007459                                                             |
| 280 | 1428048_at   | -3.15E+00 | 4.33E-01 | BC027582                              | 269472                            | --                                                                    |
| 281 | 1420190_at   | -3.15E+00 | 4.33E-01 | --                                    | --                                | --                                                                    |
| 282 | 1440973_at   | -3.15E+00 | 4.33E-01 | LOC552874                             | 552874                            | --                                                                    |
| 283 | 1450288_at   | -3.15E+00 | 4.33E-01 | Cdh6                                  | 12563                             | NM_007666                                                             |
| 284 | 1443044_at   | -3.15E+00 | 4.33E-01 | A830091E24                            | 414271                            | --                                                                    |
| 285 | 1445687_at   | -3.14E+00 | 4.33E-01 | --                                    | 380732                            | XM_354645                                                             |
| 286 | 1421104_at   | -3.14E+00 | 4.33E-01 | Mpa2 /// LOC547126                    | 17472 ///<br>547126               | NM_008620 ///<br>XM_621976                                            |
| 287 | 1431732_at   | -3.14E+00 | 4.33E-01 | Spag16                                | 66722                             | NM_025728 ///<br>NM_029160                                            |
| 288 | 1447619_at   | -3.14E+00 | 4.33E-01 | Rtn3                                  | 20168                             | NM_001003930 ///<br>NM_001003933 ///<br>NM_001003934 ///<br>NM_053076 |
| 289 | 1436188_a_at | -3.14E+00 | 4.33E-01 | Ndrp4                                 | 234593                            | NM_145602                                                             |
| 290 | 1427157_at   | -3.13E+00 | 4.33E-01 | E030025D05Rik                         | 216613                            | NM_181577                                                             |
| 291 | 1431698_at   | -3.13E+00 | 4.33E-01 | Ubash3a                               | 328795                            | NM_177823                                                             |
| 292 | 1424029_at   | -3.13E+00 | 4.33E-01 | Tspsyl4                               | 72480                             | NM_030203                                                             |
| 293 | 1425395_at   | -3.13E+00 | 4.33E-01 | Adam26a                               | 13525                             | NM_010085                                                             |
| 294 | 1459357_at   | -3.13E+00 | 4.33E-01 | Nfasc                                 | 269116                            | NM_182716                                                             |
| 295 | 1445096_at   | -3.12E+00 | 4.39E-01 | --                                    | --                                | --                                                                    |
| 296 | 1458061_at   | -3.11E+00 | 4.43E-01 | C130033P17Rik                         | 402769                            | --                                                                    |
| 297 | 1440148_at   | -3.10E+00 | 4.44E-01 | Gpr6                                  | 140741                            | NM_199058                                                             |
| 298 | 1425833_a_at | -3.10E+00 | 4.45E-01 | Hpca                                  | 15444                             | NM_010471                                                             |
| 299 | 1420543_at   | -3.10E+00 | 4.45E-01 | ORF28                                 | 246738                            | NM_138664                                                             |
| 300 | 1433965_at   | -3.09E+00 | 4.45E-01 | Atp8a1                                | 11980                             | NM_009727                                                             |
| 301 | 1427667_s_at | -3.09E+00 | 4.49E-01 | Tcrb-J /// LOC330294 ///<br>LOC333791 | 21580 ///<br>330294 ///<br>333791 | XM_284182 ///<br>XM_289900                                            |
| 302 | 1420618_at   | -3.08E+00 | 4.50E-01 | Cpeb4                                 | 67579                             | NM_026252                                                             |
| 303 | 1444428_at   | -3.08E+00 | 4.50E-01 | --                                    | --                                | --                                                                    |
| 304 | 1452072_at   | -3.08E+00 | 4.50E-01 | Myct1                                 | 68632                             | NM_026793                                                             |
| 305 | 1456536_at   | -3.08E+00 | 4.50E-01 | Thap6                                 | 381650                            | --                                                                    |
| 306 | 1431684_at   | -3.07E+00 | 4.50E-01 | 4933402J24Rik                         | 74438                             | NM_028940                                                             |
| 307 | 1456562_x_at | -3.07E+00 | 4.50E-01 | KIAA0415                              | 231855                            | NM_172725                                                             |
| 308 | 1436178_at   | -3.07E+00 | 4.50E-01 | Leprel1                               | 210530                            | NM_173379                                                             |
| 309 | 1457289_at   | -3.07E+00 | 4.50E-01 | Nr2e1                                 | 21907                             | NM_152229                                                             |
| 310 | 1436025_at   | -3.07E+00 | 4.50E-01 | A430106J12Rik                         | 108686                            | NM_176841                                                             |
| 311 | 1443005_at   | -3.07E+00 | 4.50E-01 | Zfhx1a                                | 21417                             | NM_011546                                                             |
| 312 | 1445580_at   | -3.06E+00 | 4.50E-01 | Matn2                                 | 17181                             | NM_016762                                                             |
| 313 | 1431091_at   | -3.06E+00 | 4.50E-01 | Pygo1                                 | 72135                             | XM_134865                                                             |
| 314 | 1421483_at   | -3.05E+00 | 4.55E-01 | Lhx4                                  | 16872                             | NM_010712                                                             |
| 315 | 1444145_at   | -3.05E+00 | 4.55E-01 | --                                    | --                                | --                                                                    |
| 316 | 1455701_at   | -3.05E+00 | 4.55E-01 | Snx26                                 | 233071                            | NM_178252                                                             |
| 317 | 1446525_at   | -3.05E+00 | 4.55E-01 | Gpc3                                  | 14734                             | NM_016697                                                             |
| 318 | 1435113_x_at | -3.05E+00 | 4.55E-01 | Stmn3                                 | 20262                             | NM_009133                                                             |
| 319 | 1439018_at   | -3.04E+00 | 4.58E-01 | --                                    | --                                | --                                                                    |
| 320 | 1422606_at   | -3.04E+00 | 4.59E-01 | C1qtnf3                               | 81799                             | NM_030888                                                             |
| 321 | 1454903_at   | -3.04E+00 | 4.59E-01 | Ngfr                                  | 18053                             | NM_033217                                                             |
| 322 | 1445331_at   | -3.03E+00 | 4.59E-01 | --                                    | --                                | --                                                                    |
| 323 | 1448748_at   | -3.03E+00 | 4.59E-01 | Plek                                  | 56193                             | NM_019549                                                             |
| 324 | 1430511_at   | -3.03E+00 | 4.59E-01 | 1500037O19Rik                         | 70254                             | --                                                                    |
| 325 | 1417803_at   | -3.03E+00 | 4.59E-01 | 1110032A04Rik                         | 66183                             | NM_133675                                                             |
| 326 | 1446327_at   | -3.03E+00 | 4.59E-01 | --                                    | --                                | --                                                                    |
| 327 | 1448785_at   | -3.02E+00 | 4.59E-01 | Cbfa2t1h                              | 12395                             | NM_009822                                                             |
| 328 | 1458673_at   | -3.02E+00 | 4.59E-01 | 1700093J21Rik                         | 74296                             | XM_484572 ///<br>XM_622717                                            |
| 329 | 1444784_at   | -3.02E+00 | 4.59E-01 | 4930564K09Rik                         | 78212                             | --                                                                    |

|     |              |           |          |               |        |                                         |
|-----|--------------|-----------|----------|---------------|--------|-----------------------------------------|
| 330 | 1428902_at   | -3.01E+00 | 4.59E-01 | Chst11        | 58250  | NM_021439                               |
| 331 | 1453969_at   | -3.01E+00 | 4.59E-01 | MGI:1920494   | 73244  | NM_028477                               |
| 332 | 1458643_at   | -3.01E+00 | 4.59E-01 | Dtx1          | 14357  | NM_008052                               |
| 333 | 1440363_at   | -3.00E+00 | 4.65E-01 | --            | --     | --                                      |
| 334 | 1454719_at   | -3.00E+00 | 4.65E-01 | 5730411O18Rik | 279766 | NM_177370                               |
| 335 | 1443347_at   | -3.00E+00 | 4.65E-01 | --            | --     | --                                      |
| 336 | 1427845_at   | -2.99E+00 | 4.68E-01 | Fgfr4         | 14186  | NM_008011                               |
| 337 | 1444608_at   | -2.99E+00 | 4.70E-01 | Ankrd17       | 81702  | NM_030886 ///<br>NM_198010<br>NM_011196 |
| 338 | 1450344_a_at | -2.98E+00 | 4.72E-01 | Ptger3        | 19218  |                                         |
| 339 | 1439912_at   | -2.97E+00 | 4.76E-01 | 9430098F02Rik | 103793 | --                                      |
| 340 | 1425905_at   | -2.97E+00 | 4.76E-01 | --            | --     | --                                      |
| 341 | 1452644_at   | -2.97E+00 | 4.76E-01 | Mbd3l2        | 234988 | NM_144934                               |
| 342 | 1420582_at   | -2.97E+00 | 4.76E-01 | Cd209e        | 170780 | NM_130905                               |
| 343 | 1433770_at   | -2.97E+00 | 4.76E-01 | Dpysl2        | 12934  | NM_009955                               |
| 344 | 1444778_at   | -2.96E+00 | 4.76E-01 | Sept3         | 24050  | NM_011889                               |
| 345 | 1432169_at   | -2.96E+00 | 4.76E-01 | 4930523O13Rik | 74726  | --                                      |
| 346 | 1459250_at   | -2.96E+00 | 4.76E-01 | MGI:2153084   | 228911 | NM_080455                               |
| 347 | 1444423_at   | -2.96E+00 | 4.76E-01 | --            | --     | --                                      |
| 348 | 1416992_at   | -2.96E+00 | 4.76E-01 | Mfng          | 17305  | NM_008595                               |
| 349 | 1435280_at   | -2.95E+00 | 4.80E-01 | AI452195      | 105178 | --                                      |
| 350 | 1440396_at   | -2.95E+00 | 4.81E-01 | Mpp6          | 56524  | NM_019939                               |
| 351 | 1442615_at   | -2.95E+00 | 4.82E-01 | Adk           | 11534  | NM_134079                               |
| 352 | 1447857_at   | -2.94E+00 | 4.87E-01 | D230005D02Rik | 239188 | NM_172813                               |
| 353 | 1448812_at   | -2.94E+00 | 4.87E-01 | Hpcal1        | 53602  | NM_016677                               |
| 354 | 1439557_s_at | -2.93E+00 | 4.91E-01 | Ldb2          | 16826  | NM_010698                               |
| 355 | 1449637_at   | -2.93E+00 | 4.91E-01 | Cdh4          | 12561  | NM_009867                               |
| 356 | 1445816_at   | -2.93E+00 | 4.91E-01 | --            | --     | --                                      |
| 357 | 1452467_at   | -2.93E+00 | 4.91E-01 | Mmab          | 77697  | NM_029956                               |
| 358 | 1432518_at   | -2.92E+00 | 4.91E-01 | 4930430J20Rik | 78109  | --                                      |
| 359 | 1441628_at   | -2.92E+00 | 4.91E-01 | Diap3         | 56419  | NM_019670                               |
| 360 | 1438772_at   | -2.92E+00 | 4.91E-01 | Zfp367        | 238673 | NM_175494                               |
| 361 | 1440302_at   | -2.92E+00 | 4.93E-01 | Slc25a3       | 18674  | NM_133668                               |
| 362 | 1441831_x_at | -2.91E+00 | 4.96E-01 | Clcn5         | 12728  | NM_016691                               |
| 363 | 1449874_at   | -2.91E+00 | 4.96E-01 | Ly96          | 17087  | NM_016923                               |
| 364 | 1446155_at   | -2.91E+00 | 4.97E-01 | --            | --     | --                                      |
| 365 | 1452751_at   | -2.90E+00 | 5.00E-01 | Ebf3          | 13593  | NM_010096                               |

Title refers to the gene title, Probeset\_id refers to the Affymetrix probe ID. The score refers to the PowerExpress value that incorporates both fold-change and *P*-value. FDR indicates the false discovery rate, and the gene ID is given in the final column.

**Table S6. The top-20 predicted enhancer elements using EEL**

| Rank | Gene          | Coordinates               | qPCR |
|------|---------------|---------------------------|------|
| 1    | <u>Ptch1</u>  | chr13:60949059-60949576   | +    |
| 2    | BC017647      | chr11:77879370-77881080   |      |
| 3    | Kif5a         | chr10:127004002-127004301 |      |
| 4    | <u>Ptch1</u>  | chr13:60956203-60957612   | +    |
| 5    | Ntn1          | chr11:68031783-68031998   |      |
| 6    | Ngfr          | chr11:95396268-95396731   |      |
| 7    | 4831426119Rik | chr12:100377810-100377958 | +    |
| 8    | Abcb8         | chr5:22884482-22884701    |      |
| 9    | Olfm1         | chr2:28152536-28152588    |      |
| 10   | <u>Nkx2-9</u> | chr12:53347501-53347755   | +    |
| 11   | 2600003E23Rik | chr5:34368835-34369174    |      |
| 12   | Phox2a        | chr7:95939471-95939679    |      |
| 13   | Rad54l        | chr4:115033946-115035434  |      |
| 14   | Hoxb2         | chr11:96176306-96176394   |      |
| 15   | Nkx2-9        | chr12:53332902-53334901   |      |
| 16   | Snx26         | chr7:25981542-25982431    |      |
| 17   | 1810059G22Rik | chr19:7999574-8001182     |      |
| 18   | <u>Nkx2-9</u> | chr12:53340887-53341102   | +    |
| 19   | <u>Foxa2</u>  | chr2:147493732-147495645  | +    |
| 20   | Mtap1b        | chr13:95603717-95603819   |      |

Enhancers also identified by location analysis are underlined. Conditions were performed as described (Hallikas et al., 2006) ( $\lambda=2$ ,  $\mu=0.12$ ,  $\nu=200$ ,  $\xi=200$ , module length  $\leq 2000$ , Gli score  $\geq 25$ ) except that we required EEL score  $\geq 100$  instead of  $\geq 500$ , and the predictions were ranked by combined Gli score instead of by total EEL score. We chose our current criteria since they resulted in the inclusion of validated enhancers in Ptch1 and Nkx2-9 into the top 20 predictions. Enhancers were tested by qPCR on LMP-PCR amplified CHIP tissue.

**Table S7. Genome-wide screen of Gli target genes in mouse using MCA**

| Rank | Gene                | Rank | Gene                | Rank | Gene                 |
|------|---------------------|------|---------------------|------|----------------------|
| 1    | Zswim2              | 18   | 1700011F03Rik       | 35   | Ntn4                 |
| 2    | Ppp3ca              | 19   | <b>Gpc3</b>         | 36   | Cntnap2              |
| 3    | Lrfr5               | 20   | Utrn                | 37   | Nol4                 |
| 4    | Ncam1               | 21   | Nfia                | 38   | Camk2g               |
| 5    | <b>Hhip</b>         | 22   | Gpc5                | 39   | <b><u>Nkx2-9</u></b> |
| 6    | <b><u>Ptch1</u></b> | 23   | Eda                 | 40   | Ntrk2                |
| 7    | A2bp1               | 24   | 1700108E19Rik       | 41   | Ahd1                 |
| 8    | Stk32a              | 25   | 2810426N06Rik       | 42   | 1700022L09Rik        |
| 9    | Odz2                | 26   | Arid5b              | 43   | Foxf1a               |
| 10   | Bcas3               | 27   | Adamts2             | 44   | BC052066             |
| 11   | Srisnf2l            | 28   | Tex264              | 45   | Pitpnb               |
| 12   | Mapk4               | 29   | Xlr3a               | 46   | Ndr3                 |
| 13   | Ntng2               | 30   | Prkag1              | 47   | Sh2d1b               |
| 14   | Opcm1               | 31   | Dcbl1               | 48   | Ank2                 |
| 15   | Reln                | 32   | Gopc                | 49   | Mar1                 |
| 16   | Grm3                | 33   | Nrf1                | 50   | Prkce                |
| 17   | Ctnna2              | 34   | <b><u>Robo2</u></b> | 51   | Atp5h                |

Genes are ranked by combined Gli-binding affinity. The neural targets that were subsequently validated by qPCR are denoted by bold, underlined text.

**Table S8. Top-20 Gli enhancers identified by MCA present in the pool of EB genes upregulated by Hh treatment**

| Rank | MCA           | Coordinates              | qPCR |
|------|---------------|--------------------------|------|
| 1    | Ncam1         | chr9:49835328-49835543   |      |
| 2    | Ebf3          | chr7:131683012-131684612 |      |
| 3    | <u>Nkx2-9</u> | chr12:53347461-53347776  | +    |
| 4    | <u>Ptch1</u>  | chr13:60948913-60949595  | +    |
| 5    | Gpm6b         | chrX:159911226-159911457 |      |
| 6    | Gpc3          | chrX:47041532-47041785   |      |
| 7    | Robo2         | chr16:73388698-73389494  | +    |
| 8    | Gpc3          | chrX:47086023-47086378   | +    |
| 9    | Ret           | chr6:118619345-118619637 | +    |
| 10   | Neurog2       | chr3:126511586-126512041 |      |
| 11   | Ebf1          | chr11:44728066-44728630  |      |
| 12   | Ctnna2        | chr6:77576792-77577343   |      |
| 13   | <u>Ptch1</u>  | chr13:60951919-60952536  | +    |
| 14   | Ctnna2        | chr6:77525938-77526505   |      |
| 15   | <u>Ptch1</u>  | chr13:60955950-60956548  | +    |
| 16   | <u>Nkx2-9</u> | chr12:53340885-53341147  | +    |
| 17   | Ascl1         | chr10:87473182-87474379  |      |
| 18   | Hoxb          | chr11:96102714-96103772  |      |
| 19   | Trpm3         | chr19:21679064-21679850  |      |
| 20   | <u>FoxA2</u>  | chr2:147493773-147494127 | +    |

Note that the Gpc3 enhancers predicted here differ from a validated enhancer present in the mesenchyme ventral to the neural tube. This target, identified in a previous study using EEL (Hallikas et al., 2006), is not present as a top-20 target in Table S6 because it is sorted based on Gli score instead of total EEL score.



**Table S9. Summary of qPCR-validated Gli-binding regions and procedures that identified sites**

| Gene            | Coordinates                | Identification         |
|-----------------|----------------------------|------------------------|
| FoxA2 – peak1   | chr2:147493701-147494245   | ChIP-on-chip, MCA, EEL |
| Gli1 – peak1    | chr 10:127076571-127078504 | ChIP-on-chip           |
| Gpc3            | chr X:47086023-47086378    | MCA                    |
| Hhip – peak1    | chr 8:79270092-79270492    | ChIP-on-chip           |
| Hhip – peak2    | chr 8:79268419-79268867    | ChIP-on-chip           |
| Nkx 2-1 – peak1 | chr 12:53245748-53246351   | ChIP-on-chip           |
| Nkx2-2 – peak1  | chr 2:146644626-146645570  | ChIP-on-chip           |
| Nkx2-9 – peak1  | chr 12:53340519-53341015   | ChIP-on-chip, MCA, EEL |
| Nkx2-9 – peak2  | chr 12:53347310-53348354   | ChIP-on-chip, MCA, EEL |
| Ptch1 – peak1   | chr 13:60945578-60945972   | ChIP-on-chip           |
| Ptch1 – peak2   | chr 13:60949397-60950371   | ChIP-on-chip, MCA, EEL |
| Ptch1 – peak3   | chr 13:60951377-60952953   | ChIP-on-chip, MCA      |
| Ptch1 – peak4   | chr 13:60953950-60955072   | ChIP-on-chip           |
| Ptch1 – peak5   | chr 1360956284-60956777    | ChIP-on-chip, MCA, EEL |
| Ptch2 – peak1   | chr 4:116057320-116057946  | ChIP-on-chip           |
| Ptch2 – peak2   | chr 4:116054385-116054954  | ChIP-on-chip           |
| Rab34 – peak1   | chr 11:77915220-77915560   | ChIP-on-chip           |
| Ret             | chr 6:118619345-118619637  | MCA                    |
| Robo2           | chr 16:73388698-73389494   | MCA                    |
| 4831426119Rik   | chr 12:100377810-100377958 | EEL                    |

All Gli1-binding sites identified in this study that showed enrichment in additional qPCR-based ChIP assays are listed along with the identification methods that identified each site (see results). When more than one method identified overlapping coordinates, the values refer to the ChIP-on-chip coordinates defined in Table 1 (other coordinates refer to Tables S6 and S8). Note that several sites were identified only by the EEL or MCA algorithms; in all cases, these regions were not present on the custom tiling array.
